1  
2  
3  
4  
5  
6  
7  
8  
9  
10  
11  
12  
13  
14  
15  
16  
17  
18  
19  
20  
21  
22  
23  
24  
25

**Effect of elevated embryonic incubation temperature on the temperature preference of juvenile lake (*Coregonus clupeaformis*) and round whitefish (*Prosopium cylindraceum*)**

Adam A. Harman<sup>1</sup>, Hannah Mahoney<sup>1</sup>, William Andrew Thompson<sup>1</sup>, Meghan L.M. Fuzzen<sup>1</sup>,  
Bhuvan Aggarwhal<sup>1</sup>, Lisa Laframboise<sup>1</sup>, Douglas R. Boreham<sup>2</sup>, Richard G. Manzon<sup>3</sup>,  
Christopher M. Somers<sup>3</sup>, Joanna Y. Wilson<sup>1</sup>

<sup>1</sup>Department of Biology, McMaster University, 1280 Main St. West, Hamilton, ON L8S 4K1, Canada

<sup>2</sup>Medical Sciences, Northern Ontario School of Medicine, Laurentian University, 935 Ramsey Lake Road, Sudbury, ON P3E 2C6, Canada

<sup>3</sup>Department of Biology, University of Regina, 3737 Wascana Parkway, Regina, Saskatchewan S4S 0A2, Canada

Corresponding Author: Joanna Y. Wilson ([joanna.wilson@mcmaster.ca](mailto:joanna.wilson@mcmaster.ca))

Running Title: Early temperature affects thermal preference

Key Words: Thermal effluent, climate change, behavioral thermoregulation, development, cold-water species, native species

26 Abstract

27 Anthropogenic impacts can lead to increased temperatures in freshwater environments through  
28 thermal effluent and climate change. Thermal preference of aquatic organisms can be modulated  
29 by abiotic and biotic factors including environmental temperature. Whether increased  
30 temperature during embryogenesis can lead to long-term alterations in thermal preference has not  
31 been explicitly tested in native freshwater species. Lake (*Coregonus clupeaformis*) and round  
32 (*Prosopium cylindraceum*) whitefish were incubated at natural and elevated temperatures until  
33 hatching, following which, all groups were moved to common garden conditions (15°C) during  
34 the post-hatching stage. Temperature preference was determined at 8 (Lake whitefish only) and  
35 12-months of age (both species), using a shuttlebox system. Round whitefish preferred a cooler  
36 temperature when incubated at 2°C and 6°C compared to 0.5°C. Lake whitefish had similar  
37 temperature preferences regardless of age, weight, and incubation temperature. These results  
38 reveal that temperature preference in freshwater fish can be programmed during early  
39 development, and that round whitefish may be more sensitive to incubation temperature. This  
40 study highlights the effects that small increases in temperature caused by anthropogenic impacts  
41 may have on cold-adapted freshwater fish.

42

43

44

45

46

47

48

49

50

51

52

## 53 Introduction

54 Anthropogenic impacts have created scenarios where animals may be experiencing  
55 thermal stress during early critical life stages. Current predictions have proposed that the great  
56 lakes are expected to rise in temperature between 4-6°C by 2100 (IPCC, 2014), at a rate of about  
57 0.1°C/year (Austin and Colman, 2007). More immediate concerns arise from warmer effluent  
58 discharge from industrial practices that use natural bodies of water to remove waste heat. This  
59 effluent can lead to increases in local habitats by 1-3°C, particularly those along the shoreline  
60 (Thome et al., 2016). Nearshore environments are critical regions for aquatic species, such as  
61 fish, providing regions to forage, shelter, and breed (Hampton et al., 2011). One risk for aquatic  
62 species that breed in these environments is the exposure of immobile embryos to supraoptimal  
63 temperature conditions throughout embryogenesis.

64 Environmental temperature exerts considerable control over the chemical process  
65 orchestrating development in fish (Stevens and Fry, 1970). Water temperature is a key  
66 determinant of growth in fish (Jobling, 1981; Magnuson et al., 1979), with increased temperature  
67 during embryogenesis leading to accelerated growth and developmental rates (Gillooly and  
68 Dodson, 2000; Nytrø et al., 2014; Sun and Chen, 2014). However, fish embryos display many  
69 plastic traits that can be influenced by their developmental environment (Jonsson and Jonsson,  
70 2019). For instance, a positive relationship has been noted with incubation temperature and post-  
71 hatch metabolic rate in several fish species (Barrionuevo and Burggren, 1999; Bozek et al., 1990;  
72 Marty et al., 1990). Interestingly, the thermal optimum of key metabolic enzymes at the adult  
73 stage increases in response to temperatures experienced during rearing (Schnurr et al., 2014).  
74 Taken together, this may be indicative of an increased need to elevate body temperature to meet  
75 changes in metabolic demands. As ectothermic poikilotherms, several studies have demonstrated  
76 that fish aggregate to their thermal preference ( $T_{pref}$ ; Kellogg and Gift, 1983; Reynolds and  
77 Casterlin, 1980; Stevens and Fry, 1970), to maintain their metabolic, growth, and/or reproductive  
78 optimums (Haesemeyer, 2020; Larsson, 2005).  $T_{pref}$  has been shown to vary across life-stage  
79 (Edsall, 1999), season (Mortensen et al., 2007), time of day (Macnaughton et al., 2018) and  
80 metabolic state (Killen, 2014). However, the impact of elevated incubation temperature and any  
81 long-term change to  $T_{Pref}$ , particularly in native cold-water fish, has not been explicitly tested.

82 Lake (*Coregonus clupeaformis*; LWF) and round (*Prosopium cylindraceum*; RWF)  
83 whitefish are cold-water adapted species that have an extensive range across North America  
84 (Ebener et al., 2010). These fish species serve an important ecological role in food webs and  
85 support commercial fisheries and indigenous communities (Ebener et al., 2010). LWF and RWF  
86 occur sympatrically, co-existing due to differential habitat and resource usage within lakes  
87 (Eberts et al., 2016). Both species of whitefish broadcast spawn in shallow (<10m) cobble beds  
88 in late November, and embryos remain in these shallow waters until the ice melt in spring (April-  
89 May; Scott and Crossman, 1973). These long incubation periods coincide with temperatures of  
90 0.5-2°C at these depths (Patrick et al., 2013; Schwab et al., 1999; Thome et al., 2016), and these  
91 animals may be sensitive to increases in temperature imposed by anthropogenic impacts. Indeed,  
92 laboratory studies strongly support this, with whitefish exposed to elevated temperature during  
93 embryogenesis generally exhibiting perturbed morphology, precocious development, and  
94 increased mortality (Brooke, 1975; Eme et al., 2015; Eme et al., 2018; Lee et al., 2016; Lim et  
95 al., 2017; Lim et al., 2018; Mitz et al., 2019; Mueller et al., 2015; Mueller et al., 2017; Patrick et  
96 al., 2013; Price, 1940). These effects become more prevalent at constant temperatures  $\geq 5^\circ$  (Price,  
97 1940; Brooke, 1975; Lim et al., 2017; Lim et al., 2018; Mitz et al., 2019; Eme et al., 2015; Eme  
98 et al., 2018; Mueller et al., 2015; Mueller et al., 2017; Patrick et al., 2013), with RWF appearing  
99 more sensitive, experiencing mortality rates 30-40% higher than LWF (Lim et al., 2017; Lim et  
100 al., 2018). Thermal stress during embryogenesis can augment and perturb the typical  
101 development of both LWF and RWF, but studies exploring impacts at post-hatch stages are  
102 limited. Work at later life-stages is a necessity given that whitefish embryos could be exposed to  
103 temperatures as high as 5°C now and up to 8°C within ~30 years at the current rate of warming  
104 (Austin & Colman, 2007).

105 This study tested the hypothesis that elevated temperature during rearing could impact the  
106 resulting thermal preference of juvenile LWF and RWF. Elevated temperature can lead to  
107 lethality in embryos of these species, but sublethal effects, such as changes in length and weight  
108 (Brooke, 1975; Price, 1940; Mitz et al., 2019; Lee et al., 2016), may lead to altered performance  
109 and function at later life-stages. To test this, we reared LWF at their optimum and natural rearing  
110 conditions (2°C) and elevated constant water temperatures of 5 and 8°C. As RWF are more  
111 sensitive to elevated incubation temperature and experience nearly 100% mortality at 8°C (Lim  
112 et al., 2017; Lim et al., 2018), we exposed RWF to 2°C and 6°C, and a colder temperature

113 (0.5°C), to see effects in a lower range of environmental temperatures. We assessed behavioral  
114 performance at 8 and 12 months for LWF, and 12 months for RWF, determining their  $T_{Pref}$ ,  
115 velocity, total distance travelled, and movement across temperature gradients. The results  
116 suggest that elevated incubation temperature can alter RWF  $T_{Pref}$ , but not LWF.

117

## 118 Methods

### 119 Study Species

120 Fertilized LWF embryos were acquired from Sharbot Lake White Fish Culture Station (Sharbot  
121 Lake, ON) on November 30, 2017 (reared to 12-months) or November 27, 2018 (reared to 8-  
122 months). Spawning RWF were obtained from Lake Ontario (Port Darlington, GPS 43°51'50"N  
123 78°44'35"W) on December 10 and 11, 2018. RWF were stripped of eggs and milt and returned to  
124 the water. Artificial in-vitro fertilization occurred immediately after stripping. Embryos were  
125 disinfected with Ovadine® solution and transported in lake water back to McMaster University.  
126 Embryos (160-310) were plated into 200mm x 20mm sterile petri dishes containing 200mL of  
127 dechlorinated city tap water, and then moved to incubators (Mitz et al., 2014). Embryos were  
128 initially kept at 8°C and cooled (1°C/week) until they reached a base temperature of 2°C, 5°C or  
129 8°C for LWF or 2°C or 6°C for RWF (Fig. 1). To create the treatment for the 0.5°C RWF  
130 embryos, an ice slurry was maintained within an incubator set to 2°C. Incubation temperature  
131 was maintained for 100 days to replicate the winter period (December to March), following  
132 which, embryos were warmed (1°C/week) until reaching 8°C. To confirm temperature within  
133 each incubator, TidbiT® temperature loggers placed in 200mm x 200mm petri dishes with 200  
134 mL of dechlorinated water. For the base temperature (excluding warming and cooling periods),  
135 LWF were exposed to  $2.08 \pm 0.3^\circ\text{C}$ ,  $4.81 \pm 0.3^\circ\text{C}$ ,  $8.05 \pm 0.1^\circ\text{C}$ , and RWF to  $0.54 \pm 0.2^\circ\text{C}$ ,  $2.58$   
136  $\pm 0.2^\circ\text{C}$ ,  $6.13 \pm 0.2^\circ\text{C}$ . Median hatch for LWF occurred at 50 days post fertilization (8°C), 108  
137 days post fertilization (5°C), and 158 days post fertilization (2°C). Median hatch for RWF  
138 occurred at 88 days post fertilization (6°C), 114 days post fertilization (2°C), and 118 days post  
139 fertilization (0.5°C). Hatchlings (~10) were placed in 100mm x 20mm petri dishes with 100 mL  
140 of water at 8°C until successful exogenous feeding. Water in petri dishes was changed three  
141 times a week for embryos and daily for larvae. Larvae were transferred to 1-10L recirculating  
142 tanks and warmed (1°C/week) to 15°C, where they remained until testing (8- or 12-months post-

143 hatch). All treatment groups were maintained in common garden conditions once they were  
144 warmed to 15°C. Larval fish were initially fed *Artemia* nauplii and slowly transitioned to pellet  
145 feed (Otohime B1 (200-360 µm) – C2 (920-1,410 µm) larval feed).

146

#### 147 Behavioral Assay – Shuttle Box

148 The shuttle box system (Loligo®), first described by Neill et al. (1972), consists of two  
149 cylindrical tanks connected by a small rectangular ‘shuttle’ to allow movement of animals  
150 between the tanks. Each tank is designated as the increasing (INCR) or decreasing (DECR) side,  
151 indicating the direction of temperature change when fish occupy that tank. To regulate  
152 temperature, system water was pumped through heat-exchange coils in hot (28°C) and cold  
153 (4°C) water baths (60L chest coolers) with mixing in separate buffer tanks for each side. A  
154 Recirculator 1/4 HP Chiller, Magnetic Drive Centrifugal Pump (300W/600W/950W @  
155 0°C/10°C/20°C; VWR) and 2x400W aquarium heaters were used to maintain the temperatures in  
156 the cold and warm bath, respectively. The shuttle box temperature probe can report temperature  
157 units to 0.01°C accuracy. Polystyrene insulation (1/2") and foam insulation tape (1/4") were used  
158 to prevent heat loss and maintain stable temperatures in the cold-water bath. System water  
159 flowed at 240 mL/min via gravitational pull through temperature probes and into the shuttle box  
160 where mixing between the two sides is minimized by counter-directional currents. The  
161 orientation of the INCR and DECR tanks and the side to which the fish would be introduced  
162 were randomized for each individual, using an online tool (random.org), to limit any potential  
163 bias introduced by visual cues or side preference. Whitefish of the appropriate treatment group  
164 were randomly selected from their home tank (15°C) and transported to the shuttle box system in  
165 blacked-out 1L glass beakers to prevent undue stress. A plastic divider separated the two halves  
166 of the arena, which when removed, started the acclimation period. Fish were acclimated to the  
167 arena in a static setting, with the two arenas maintained to 14 and 16°C with a hysteresis of  
168 0.25°C. After 2h in this condition, the fish were tracked using a USB 2.0 uEye Camera tracked  
169 juvenile fish under infrared light (Loligo® Infrared Light Tray), recording the position of the fish  
170 in the arena. The onset of warming or cooling occurred in response to whether the fish would be  
171 in the INCR or DECR tank, with the difference in temperature between these two sections being  
172 maintained at 2°C and warming or cooling (hysteresis = 0.1°C) occurring at a rate of 4°C/hour.

173 A maximum temperature of 23°C and a minimum temperature of 7°C was implemented to  
174 prevent exposure to extreme temperatures, which could cause stress or mortality (Edsall and  
175 Rottiers, 1976).  $T_{\text{Pref}}$  was calculated by the software as the median occupied temperature;  
176 additional measurements calculated were velocity (cm/s), total distance travelled (cm), time  
177 spent in INCR/DECR, number of passages, and avoidance temperature (temperature at which a  
178 passage between tanks occurred). Following the completion of the assay period, fish were  
179 removed, and measured for total length and mass before returning to a separate home tank  
180 (15°C). Prior to experimentation, whitefish were fasted for 12-20 hours to prevent fouling of the  
181 water and to standardize metabolic state. To account for any potential growth over the study  
182 duration, the order of sampling among treatment groups was randomized using an online tool  
183 (random.org). In total, 103 (12-month-old) and 87 (8-month-old) LWF, and 83 (12-month-old)  
184 RWF were tested for  $T_{\text{Pref}}$  using the Loligo® shuttle box system. Differences in treatment group  
185 sizes were due to differential mortality in holding tanks during rearing and were not due to  
186 experimentation. Prior to experimentation, power analyses were carried out to determine the  
187 optimal sample size within an acceptable power range (0.6-0.8; Harman et al., 2021).

188

## 189 Statistical Analysis

190 Data is presented as mean±SD unless otherwise stated.  $T_{\text{Pref}}$ , velocity, total distance travelled,  
191 time in arena, number of passages, and avoidance temperature between groups were analyzed  
192 using one-way ANOVA, with Tukey's HSD post-hoc for comparisons between individual  
193 groups. To determine whether length or body weight influenced recorded  $T_{\text{Pref}}$ , a general linear  
194 model was performed. A comparison was performed to assess species specific differences, with  
195 the 12-month  $T_{\text{Pref}}$  of RWF and LWF compared using a two-tailed T-Test. Bonferroni correction  
196 was applied to correct for multiple comparisons of  $T_{\text{Pref}}$ , resulting in an  $\alpha$  taken of 0.00625 for  
197  $T_{\text{Pref}}$  analyses with LWF (a total of 4 comparisons), and 0.025 for RWF comparisons (a total of 2  
198 comparisons). We developed a relationship between time (s) and temperature change (°C) in the  
199 shuttle box to determine the upper threshold of the system. This was done to remove possible  
200 outliers, as certain individuals were too active for the shuttle box system to determine  $T_{\text{Pref}}$  due to  
201 limitations in heating/cooling rates. Outliers were identified using the robust regression and  
202 outlier removal method (ROUT; Motulsky and Brown, 2006). The residuals of this fit were



203 analyzed for potential outliers, and then subjected to ordinary least-squares regression after the  
204 removal of outliers. A total of 4 outliers were identified and removed using the ROUT method (2  
205 x 8-month-old LWF, 2 x 12-month-old RWF). All statistical analyses were completed in R  
206 (version 4.0.0 “Arbor Day”), except for outlier identification which was completed in Graphpad  
207 Prism (version 8.4.3). All data and R scripts used for analysis were uploaded to a public GitHub  
208 data repository (<https://github.com/WilsonToxLab/Shuttlebox-Thermal-Preference>).

209

## 210 Results

211 There was not a significant effect of rearing temperature on  $T_{\text{Pref}}$  on LWF of 8 months of  
212 age (Fig. 2A;  $F_{[2,82]} = 3.505$ ;  $p=0.0346$ ). Upper and lower avoidance temperatures were similar  
213 between treatment groups (Table 1). However, we note a non-significant trend, with eight-  
214 month-old LWF in the 5°C treatment group displayed the lowest activity, travelling an average  
215 distance of 173 m, compared to just over 190m at 2°C and 8°C. There was no observable change  
216 in the number of transitions between arenas in the shuttlebox in these fish. (Table 1). Total body  
217 length was similar between all treatment groups, varying less than 1mm on average (Table 1).  
218 Likewise, body weight was similar across treatment groups, with the largest difference (11%)  
219 between 2°C ( $1.13 \pm 0.32\text{g}$ ) and 5°C ( $1.25 \pm 0.39\text{g}$ ). Linear models were fit, including body  
220 weight and total length as fixed effects, to determine if there was a relationship between size and  
221  $T_{\text{pref}}$ . Model results ( $p = 0.068$ ,  $p = 0.061$ ) indicated there was no significant interaction between  
222  $T_{\text{pref}}$  with total length or body weight.

223 At 12 months of age, LWF from all treatment groups (2°C, 5°C, 8°C) displayed similar  
224  $T_{\text{pref}}$  (Fig. 2B; One-way ANOVA;  $F_{[2,100]} = 0.0765$ ;  $p=0.468$ ). Upper and lower avoidance  
225 temperatures were comparable between all treatment groups, suggesting 12-month-old LWF  
226 were avoiding temperatures below 14.3°C and above 17.4°C on average (Table 1). Average total  
227 length and body weight were similar across all treatment groups, varying less than 1mm or 0.5g,  
228 respectively. Linear models were fit, including body weight and total length as fixed effects, to  
229 determine if there was a relationship between size and  $T_{\text{pref}}$ . Model results indicated that body  
230 weight ( $p = 0.0678$ ) and total length ( $p = 0.0607$ ) did not significantly affect  $T_{\text{pref}}$  at 12-months-  
231 old.



232 Temperature exposure during rearing effects the  $T_{\text{Pref}}$  of 12-month juvenile RWF (Fig.  
233 2C; One-way ANOVA,  $F_{[2,78]}=5.509$ ;  $p=0.0058$ ). The  $T_{\text{Pref}}$  RWF juveniles incubated at 2°C  
234 ( $13.53 \pm 1.14^\circ\text{C}$ ) and 6°C ( $13.39 \pm 0.99^\circ\text{C}$ ) as embryos displayed significantly lower  $T_{\text{Pref}}$   
235 compared to those incubated at 0.5°C ( $14.27 \pm 0.95^\circ\text{C}$ ;  $p=0.0216$  and  $p=0.01$ , respectively), with  
236 no differences between the 2°C and 6°C groups ( $p=0.8764$ ). This change in preference is  
237 reflected in recordings of upper and lower avoidance temperatures. Fish exposed to 0.5°C ( $15.8$   
238  $\pm 0.75^\circ\text{C}$ ) exhibit a higher upper avoidance temperature (One-way ANOVA;  $F_{[2,78]}=3.51$ ;  
239  $p=0.0347$ ; Table 1), with both 2 ( $15.29 \pm 0.93^\circ\text{C}$ ) and 6°C ( $15.11 \pm 0.9^\circ\text{C}$ ) exposed RWF  
240 significantly decreased in comparison ( $p=0.0216$  and  $p=0.01$ , respectively). Lower avoidance  
241 temperatures exhibit a similar trend (One-way ANOVA;  $F_{[2,78]}=3.676$ ;  $p=0.0298$ ; Table 1),  
242 with 0.5°C ( $13.73 \pm 0.75^\circ\text{C}$ ) treated RWF have lower avoidance temperatures than 2 ( $13.18 \pm$   
243  $1.01^\circ\text{C}$ ) and 6°C ( $13.04 \pm 0.79^\circ\text{C}$ ) treated fish, differing significantly when compared to 6°C fish  
244 ( $p=0.03$ ). Total distance travelled (One-way ANOVA,  $F_{[2,78]}=1.885$ ,  $p=0.159$ ) and number of  
245 passages (One-way ANOVA,  $F_{[2,78]}=0.522$ ,  $p=0.596$ ) were statistically similar between all  
246 treatment groups. Total length was not consistent between treatment groups (One-way ANOVA,  
247  $F_{[2,78]}=15.097$ ,  $p<0.0001$ ) as juveniles in the 2°C group were significantly smaller than those  
248 in the 0.5°C and 6°C treatment groups ( $p<0.0001$ ). However, total length was not significantly  
249 different between 0.5°C and 6°C treatments ( $p=0.643$ ). Body weight followed the same trend as  
250 total length (One-way ANOVA,  $F_{[2,78]}=11.374$ ,  $p=.000045$ , Table 1), with the 2°C group  
251 significantly smaller in body weight on average than the 0.5°C and 6°C groups ( $p=0.0017$  and  
252  $0.0001$ , respectively).

253 As LWF and RWF reside in similar habitats, we sought to assess whether species specific  
254 differences existed in  $T_{\text{Pref}}$ . LWF reared in a similar condition to RWF (2°C), exhibit an  
255 increased preference for warmer waters at 12 months of age (Fig. 3; T-test,  $p<0.0001$ ). To  
256 investigate the effect of age on  $T_{\text{Pref}}$  we compared 8-month-old and 12-month-old LWF  
257 incubated at the standard temperature of 2°C. Average  $T_{\text{Pref}}$  for 8-month-old LWF was  $16.04 \pm$   
258  $1.14^\circ\text{C}$  compared to  $15.27 \pm 2.67^\circ\text{C}$  for 12-month-old LWF (Fig. 4), which were not statistically  
259 different (T-test,  $p=0.147$ ).

260

261 Discussion

262 Our results reveal that elevated temperatures during rearing lead to long-term changes to  
263 the  $T_{Pref}$  of RWF, but not LWF. Early-life thermal history has been shown to modulate several  
264 plastic traits, including behavior, social skills, and endocrine responses in calves (Dado-Senn et  
265 al., 2022), pigs (Johnson et al., 2018) and in fish (Jonsson and Jonsson, 2019, Li et al., 2021).  
266 While several studies have linked acute or continuous changes in temperature as the etiology of  
267 behavioral and growth changes in fish (Bartolini et al., 2015; Gillooly and Dodson, 2000;  
268 Nowicki et al., 2012; Nytrø et al., 2014; Sun and Chen, 2014), studies linking solely early-life  
269 incubation temperature to long-term perturbations or functional limitations are sparse (Jonsson  
270 and Jonsson, 2019; Scott and Johnston, 2012). Here, we provide evidence that the resulting  
271 preference of temperature for fish at the juvenile stage can be programmed during  
272 embryogenesis, but this phenotypic plasticity is species specific, and the mechanisms behind  
273 these changes are abstruse.

274 Most teleost fish function as ectotherms, requiring a conserved and coordinated suite of  
275 physiological and behavioral responses to navigate changes in ambient temperature  
276 (Haesemeyer, 2020; Stevens and Fry, 1970). For example, adults can preferentially swim to  
277 more optimal habitats when encountering thermal stress, such as effluent from power plants  
278 (Neill and Magnuson, 1974). These behavioral responses are key, allowing animals to maintain  
279 their metabolic optimums (Haesemeyer, 2020). At the embryonic stage, fish would be subjected  
280 to environmental temperatures without a recourse to navigate to more appropriate conditions.  
281 Several studies have described impacts of elevated incubation temperature during  
282 embryogenesis, with clear delineations of reductions in survivability and growth, but also in  
283 perturbed metabolism (Barrionuevo and Burggren, 1999; Bozek et al., 1990; Marty et al., 1990).  
284 In response to direct increases in ambient temperature, there is a positive linkage to metabolism  
285 (Fry and Hochachka, 1970). LWF embryos incubated at constant elevated temperatures display  
286 increased oxygen consumption (Eme et al., 2015), but it is unknown whether this difference in  
287 metabolism persists to the juvenile stage in this species. Other studies have reported increases in  
288 post-embryonic metabolism following embryonic incubations in elevated water temperatures,  
289 such as in the razorback sucker (*Xyrauchen texanus*; (Bozek et al., 1990), zebrafish (*Danio rerio*;  
290 Barrionuevo & Burggren, 1999), Arctic charr (*Salvelinus alpinus*; (Huuskonen et al., 2003) and  
291 Japanese medaka (*Oryzias latipes*; Marty et al., 2010). This suggests that the previously noted  
292 increase in metabolism (Eme et al., 2015) may persist to later life-stages. This is an important

293 point, as a functional link between basal metabolic rate and thermal preference has been  
294 established in the common minnow (*Phoxinus phoxinus*), demonstrating that fish with higher  
295 metabolic rates may prefer colder temperatures as juveniles (Killen, 2014). While this could then  
296 suggest that RWF reared at 0.5°C have a lowered metabolism, future studies would be required  
297 to confirm whether higher metabolism is at the root of lower  $T_{Pref}$  in RWF reared at 2 and 6°C.

298 Round whitefish appear to be more sensitive to elevations in rearing temperature than  
299 LWF. We originally hypothesized that increased temperature during incubation would lead to  
300 alterations in  $T_{Pref}$ , based upon previous observations that elevated ambient temperature increases  
301 mortality in these species (Brooke, 1975; Mitz et al., 2019; Eme et al., 2018; Mueller, 2017; Lee  
302 et al., 2016; Lim et al., 2017; Lim et al., 2018). At 2°C, RWF experience nearly 30% increase in  
303 mortality compared to LWF, with no embryos surviving continuous exposure to 8°C (Lim et al.,  
304 2018). RWF appear to exhibit considerable sensitivity to thermal challenges, forming our  
305 rationale to reduce the thermal regime RWF were exposed to in this study (6°C), and the  
306 inclusion of the 0.5°C incubation group. Serendipitously, this reduction revealed that 2 and 6°C  
307 appear to be capable of imparting long-term alterations to  $T_{Pref}$  behavior. This possibly presents  
308 an advantage in natural settings to whitefish reared in colder water, as fish experiencing a lower  
309 temperature during embryogenesis would then prefer a higher ambient temperature at the  
310 juvenile stage. A higher temperature is typically found higher in the water column and may  
311 present a greater food supply. Indeed, zooplankton, a major food source for larval and juvenile  
312 whitefish (Freeberg et al., 1990), is commonly found in higher abundances at warmer and  
313 shallower water (Berger et al., 2006). Taken together, rearing in colder water might provide  
314 slight behavioral advantages for RWF, suggesting that ever-increasing ambient temperature  
315 driven by anthropogenic practices may be detrimental for this species.

316 Apart from temperature stressors, RWF appear to be more sensitive to environmental  
317 perturbations than LWF. Population declines have been observed in RWF in New York State  
318 (Bouton and Stegemann, 1993; Conley et al., 2021), leading to these fish being labelled  
319 vulnerable in this state (Bouton and Stegemann, 1993). Comparing RWF to LWF, the former has  
320 historically had a smaller distribution than LWF in North America, with LWF distribution  
321 extending farther south beyond the great lakes (Ebener et al., 2008). While the specific causes of  
322 these declines are unknown, others have speculated this could be explained by the general

323 sensitivity of RWF to abiotic stressors. For example, acid rain has impacted the Adirondack  
324 lakes of New York State, lowering pH, and increasing aluminum and mercury, which interfere  
325 with reproduction and survival in these fish (Conley et al., 2021). Moreover, exposure to  
326 morpholine, a chemical used to prevent corrosion and damage to water pipes and is used as an  
327 additive in fossil fuels, leads to increased mortality and reduced body size in RWF, when  
328 compared to LWF at supraenvironmental levels (Lim et al., 2018; Thome et al., 2016). In this  
329 study, comparisons between LWF and RWF revealed that when raised at a similar temperature,  
330 LWF exhibit a higher  $T_{Pref}$  than RWF (Fig. 2). As adults, LWF occupy deeper (18-90 m) limnetic  
331 water, with RWF residing in shallow littoral depths (Bailey, 1964; Cucin and Regier, 1965;  
332 Rawson, 1951). However, as larvae and juveniles, round and lake whitefish are found feeding  
333 along shorelines in shallow water, before gradually moving to deeper waters (Faber, 1970;  
334 Hogman, 1971). The difference in preferred temperature may support the observation of these  
335 species overlapping, but occupying distinct niches and resources (Eberts et al., 2016).

336 We originally suspected that changes in size and age may play a role in determining  $T_{Pref}$   
337 of whitefish. Previous studies have shown a significant relationship between these variables and  
338 preference of temperature in LWF, with  $T_{Pref}$  decreasing as the animal grew/age (Edsall, 1999;  
339 Opuszynski, 1974). In this study, we performed assessments to investigate both factors using  
340 LWF, performing a regression for  $T_{Pref}$  compared to size (weight and length), and directly  
341 comparing the 8-, and 12-month-old age class exposed to a similar ambient temperature during  
342 embryogenesis (Fig. 3). While we note no correlations of  $T_{Pref}$  with either size or age, we must  
343 acknowledge substantial differences of our study design with previous studies investigating this  
344 species. Life-stage plays a significant role in determining the preference of the animal, as their  
345 natural history dictates a transition to deeper waters as the animal ages (Hogman, 1971). In the  
346 work by Edsall (1999) and Opuszynski (1974), thermal preference was ascertained by using  
347 considerably younger and smaller LWF. This is a key point, as their comparisons were carried  
348 out using fish separated by approximately 6-7 months (Edsall, 1999; Opuszynski, 1974), a larger  
349 difference than the present study with a 4-month difference in age. Inherently tied to this age  
350 difference is a difference in growth, as our study generated a ~10-fold increase in weight from 8  
351 to 12 months of age, and the previous studies describing a more modest increase of ~2-3 fold  
352 (Opuszynski, 1974; Edsall, 1999). Changes in growth can easily be attributed to holding  
353 temperature of post-hatch fish, with our study implementing a common garden temperature of

354 15°C, compared to the colder holding temperature used previously (8-11°C, Eddsall, 1999). This  
355 is an important consideration, as despite a substantially larger increase in absolute size in our  
356 study, we note no differences in  $T_{Pref}$ . This leads to the proposal that developmental age plays a  
357 more significant role in determining temperature preferences in LWF. Plankton tow data points  
358 to whitefish migrating from warmer coastal waters to cooler, and deeper waters at approximately  
359 4 months of age (Loftus, 1982; Ryan et al., 2014), which may suggest that the age classes  
360 investigated in this study may have surpassed windows of overt change in  $T_{Pref}$ . Another  
361 important difference between these studies is the implementation of a vertical testing chamber  
362 (Eddsall, 1999; Opuszynski, 1974), compared to the horizontal shuttlebox used here. In vertical  
363 chambers, the coldest temperature is at the bottom of the arena, which may present a behavioral  
364 factor that was not considered in our design. In novel situations, fish will exhibit more bottom  
365 dwelling type behavior (Blaser and Rosemberg, 2012), which may drive a larger preference for  
366 colder temperature. A comparison between these behavioral paradigms would be prudent for  
367 understanding how an animal's innate response during assessment may influence thermal  
368 preferences.

369 There appears to be no changes in activity levels of LWF and RWF. While the shuttlebox  
370 is not purposefully built to assess levels of general swimming, movement in this assessment may  
371 be considered a gauge of the animal's exploratory behavior to seek an optimal environment. In  
372 search of a preferred temperature, LWF and RWF of all age classes move to equivalent levels  
373 and exert a similar number of chamber transitions across all temperature treatments. Increases in  
374 temperature lead to increases in locomotion, and anxiety-like behaviours (Angiulli et al., 2020;  
375 Biro et al., 2010), with evidence suggesting that the imprinting of temperature in early-life can  
376 lead to long-term changes in behavioral responses (Li et al., 2021). While we did not explicitly  
377 assess general swimming in LWF and RWF, the results generated here suggests that early-life  
378 rearing temperature does not effectively alter behavior during thermal testing.

379 In conclusion, this study demonstrates a persistent effect of increased embryonic  
380 incubation temperature on the thermal preference of juvenile RWF. Benthic water temperatures  
381 of 2°C represent a winter of low ice cover but is sufficient to alter preferences in these fish.  
382 Given that temperatures are expected to increase (0.1°C/year; Austin & Colman, 2007), and  
383 thermal effluents impact coastal water temperature, these results raise concern for a fish species

384 that has been considered in decline (Bouton and Stegemann, 1993; Conley et al., 2021), and are  
385 rarely seen in abundant amounts ecologically (Mraz, 1964). Coastal embayments provide a  
386 thermal refuge during the spring warming (Ryan and Crawford, 2014) and ice-free conditions  
387 facilitate a spring bloom of primary productivity which is important for survival of larval  
388 whitefish (Faber, 1970). Round whitefish seeking cooler water temperatures may avoid prime  
389 nursery grounds, which would put them at a disadvantage compared to other conspecifics. Cold-  
390 adapted freshwater fish are among the taxa most vulnerable to climate change but receive a  
391 fraction of the research and conservation efforts of terrestrial species (Pacifici et al., 2015). This  
392 study highlights the importance of examining sub-lethal thermal effects and thermal plasticity of  
393 cold-adapted species. Future studies seeking to understand the role of metabolism on thermal  
394 preference are prudent, as this technique provides a non-invasive assessment of environmental  
395 performance that may be used to determine at risk-populations environmentally.

396

#### 397 List of Symbols/Abbreviations

398 LWF – Lake Whitefish (*Coregonus clupeaformis*)

399 RWF – Round Whitefish (*Prosopium cylindraceum*)

400  $T_{pref}$  – Temperature Preference

401 °C – Degrees in Celsius

402 mL – Milliliter

403 min – Minute

404 mm – Millimeter

405 g – gram

406

407

408 Acknowledgements

409 We would like to thank undergraduates Urvi Pajankar and Akanksha Arora for their  
410 contributions to whitefish husbandry. Tim Drew from the MNRF Sharbot Lake Whitefish  
411 Culture Station, and Dr. Fei Luo with Ecometrix for providing lake and round whitefish embryos  
412 respectively. Dr. Ben Bolker for statistical discussion, and Dr. Grant McClelland for feedback on  
413 design and analysis.

414

#### 415 Competing Interests

416 D.R. Boreham received funding from Bruce Power and held a position of Bruce Power Chair in  
417 Radiation and Health at the Northern Ontario School of Medicine.

418

#### 419 Author Contributions

420 Conceptualization: A.A.H., J.Y.W., R.G.M., C.S.M.; Methodology: A.A.H., J.Y.W.; Resources:  
421 A.A.H., M.L.M.F., L.L.; Formal Analysis: A.A.H., W.A.T.; Investigation: A.A.H., H.M., B.A.,  
422 M.M.L.F., L.L.; Data Curation: A.A.H., H.M., W.A.T.; Writing – original draft: A.A.H.,  
423 W.A.T.; Writing – review and editing: W.A.T., A.A.H., J.Y.W., M.L.M.F., D.R.B., C.M.S.,  
424 R.G.M.; Supervision: J.Y.W.; Project administration: A.A.H., J.Y.W., L.L.; Funding  
425 Acquisition: J.Y.W., D.R.B., C.M.S., R.G.M.

426

#### 427 Funding

428 This research was jointly funded by the Natural Sciences and Engineering Research Council  
429 (NSERC) grants CRDPJ-433617-12 and CRDPJ-528391-2018 and Bruce Power (Research  
430 contract 238641) to J.Y.W., R.G.M., and C.M.S. Funding from MITACs (IT10670) for Post-  
431 Doctoral Fellow (M.L.M.F and W.A.T.) salary.

432

#### 433 Data availability

434 Data are available from GitHub: [https://github.com/WilsonToxLab/Shuttlebox- Thermal-](https://github.com/WilsonToxLab/Shuttlebox- Thermal-Preference)  
435 Preference



436 Tables

437 **Table 1. Behavioral output and whitefish characteristics of thermal preference experiment.**

438 Fish were reared at different temperatures during embryogenesis, and then held in common  
 439 garden conditions post-hatch. Lake whitefish and round whitefish embryos were brought in at  
 440 8°C and cooled at 1°C/week to the base temperature (incubation treatment); after 100 days  
 441 incubation, temperature was warmed at 1°C/ week until they reached 8°C. This simulated natural  
 442 conditions with different base incubation temperatures. After successful exogenous feeding, fish  
 443 were warmed at 1°C/week to 15°C and were held at that temperature until experimentation in a  
 444 shuttlebox. Total sample size (n), avoidance temperatures (temperature when a passage between  
 445 chambers occurs), distance travelled, total number of passages, and length of weight of each  
 446 experiment are shown. All values are mean±SD, with different letters denoting significant  
 447 differences between groups.

448

| Species (age)               | Incubation Treatment | n  | Upper Avoidance (°C)           | Lower Avoidance (°C)            | Distance (m)   | Number of Passages | Length (mm)              | Weight (g)                     |
|-----------------------------|----------------------|----|--------------------------------|---------------------------------|----------------|--------------------|--------------------------|--------------------------------|
| Lake whitefish (8 months)   | 2°C                  | 31 | 17.54<br>(± 0.73)              | 15.41<br>(± 0.81)               | 193<br>(± 47)  | 183<br>(± 113)     | 55<br>(± 5)              | 1.13<br>(± 0.32)               |
|                             | 5°C                  | 29 | 17.23<br>(± 1.09)              | 14.93<br>(± 1.38)               | 173<br>(± 67)  | 146<br>(±121)      | 56<br>(± 6)              | 1.25<br>(± 0.39)               |
|                             | 8°C                  | 25 | 17.74<br>(± 0.52)              | 15.63<br>(± 0.57)               | 191<br>(± 60)  | 170<br>(± 124)     | 55<br>(± 9)              | 1.18<br>(± 0.51)               |
| Lake whitefish (12 months)  | 2°C                  | 31 | 17.14<br>(± 2.45)              | 14.01<br>(± 2.62)               | 247<br>(± 112) | 51<br>(± 95)       | 114<br>(± 12)            | 10.59<br>(± 3.04)              |
|                             | 5°C                  | 40 | 17.72<br>(± 2.26)              | 14.68<br>(± 1.94)               | 196<br>(± 71)  | 51<br>(± 65)       | 114<br>(± 11)            | 10.76<br>(± 3.59)              |
|                             | 8°C                  | 32 | 17.41<br>(± 1.85)              | 14.24<br>(± 2.16)               | 209<br>(± 97)  | 31<br>(± 55)       | 114<br>(± 8)             | 10.28<br>(± 2.43)              |
| Round whitefish (12 months) | 0.5°C                | 27 | 15.80<br>(± 0.75) <sup>a</sup> | 13.73<br>(± 0.75) <sup>a</sup>  | 217<br>(± 44)  | 212<br>(± 81)      | 62<br>(± 5) <sup>a</sup> | 1.60<br>(± 0.45) <sup>a</sup>  |
|                             | 2°C                  | 31 | 15.29<br>(± 0.93) <sup>b</sup> | 13.18<br>(± 1.01) <sup>ab</sup> | 189<br>(± 65)  | 188<br>(± 105)     | 55<br>(± 6) <sup>b</sup> | *1.19<br>(± 0.35) <sup>b</sup> |
|                             | 6°C                  | 23 | 15.11<br>(± 0.90) <sup>b</sup> | 13.04<br>(± 0.79) <sup>b</sup>  | 198<br>(± 41)  | 204<br>(±79)       | 62<br>(± 5) <sup>a</sup> | 1.71<br>(± 0.52) <sup>a</sup>  |

449

450

451

452 **Table 2. Temperature preference ( $T_{pref}$ ) of juvenile lake whitefish of different ages.** Age is  
453 provided in years (yrs) and months. Age in months was estimated for previously published  
454 studies by assuming median hatch occurs within March – April, as suggested by testing dates for  
455 1-year old fish.  $T_{pref}$  from the present study is reported from 2°C treatment groups only. Edsall  
456 (1999) used simulated lake water temperature during embryonic incubation. All other  $T_{Pref}$  data  
457 provided by Edsall (1999). Holding temperature refers to water temperature in home tanks from  
458 hatch until testing.

| Age (yrs) | Age (months)       | Size (g) | $T_{pref}$ (°C)    | Holding Temperature (°C) | Source            |
|-----------|--------------------|----------|--------------------|--------------------------|-------------------|
| 0         | 4-5 <sup>a</sup>   | 2.8      | 15.9               | 8-11                     | Edsall (1999)     |
| 0         | 5-6                | 1.1-1.7  | 17-18 <sup>b</sup> | - <sup>c</sup>           | Opuszynski (1974) |
| 0         | 5-6                | 1.9      | 16.8               | 8-11                     | Edsall (1999)     |
| 0         | 8                  | 1.13     | 16.04              | 15                       | Present Study     |
| 1         | 12                 | 10.59    | 15.27              | 15                       | Present Study     |
| 1         | 12-13 <sup>a</sup> | 3.9      | 15.6               | 8-11                     | Edsall (1999)     |
| 1         | 12-13              | 5.7      | 10                 | - <sup>c</sup>           | Opuszynski (1974) |

459 <sup>a</sup> Repeated measure on same cohort of fish.

460 <sup>b</sup> Temperature preference estimated via inspection by Opuszynski (1974).

461 <sup>c</sup> Information not available.

462

463 Figures

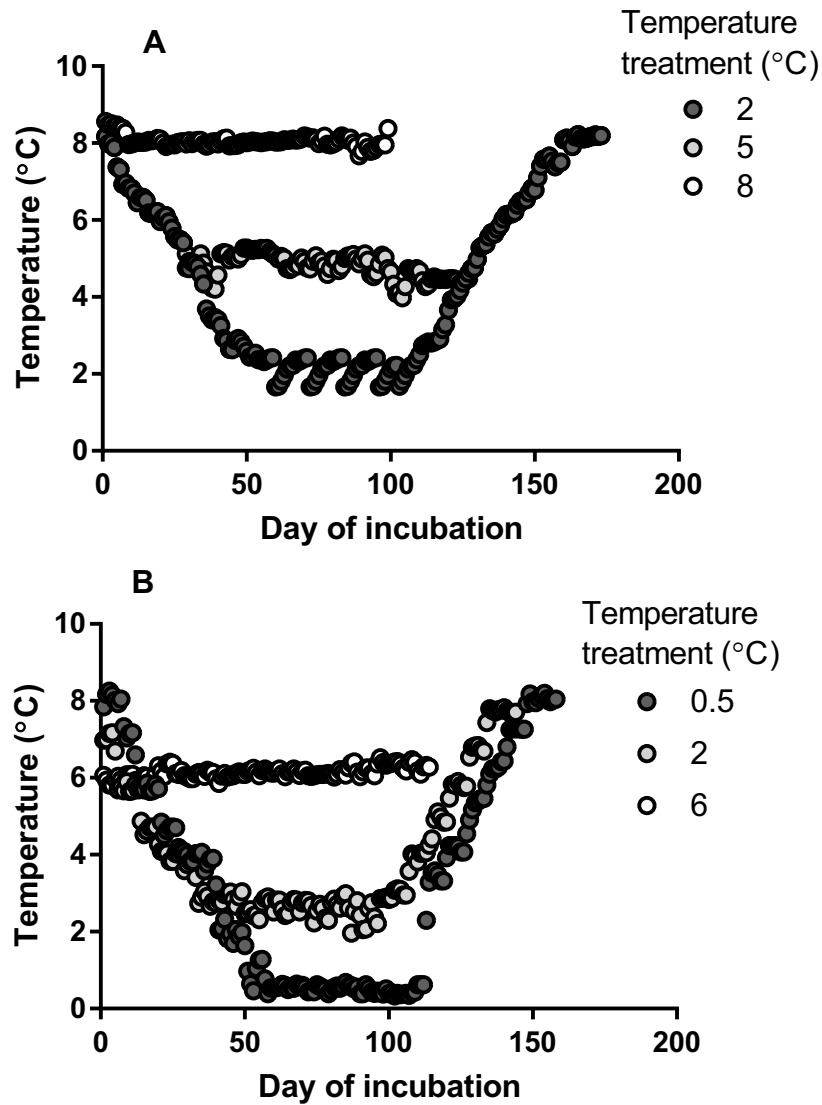

464

465 **Figure 1. Daily temperature readings of incubation of lake whitefish (LWF; A) and round whitefish**

466 **(RWF; B) until complete hatch of population. Data points represent averages of daily readings taken in**

467 15 min intervals, with error bars excluded for visibility.

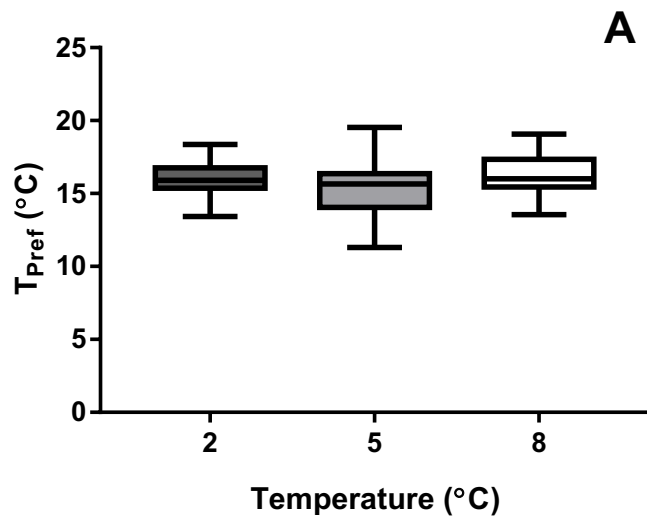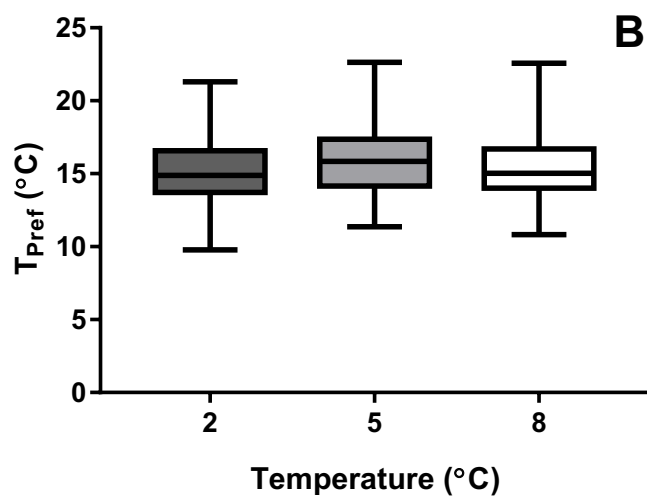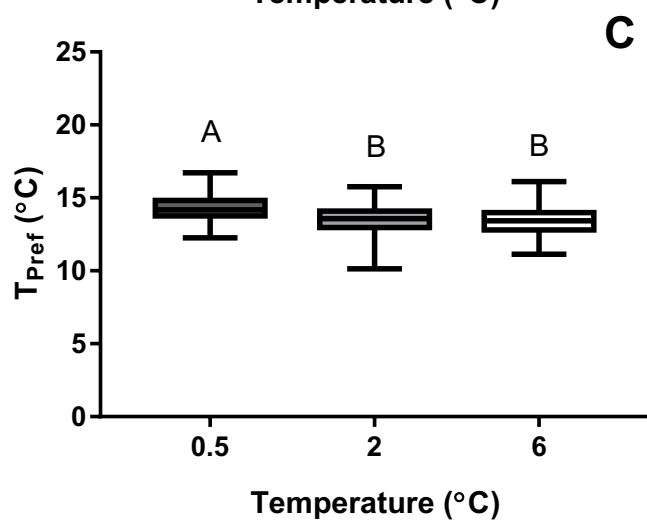

468

469 **Figure 2. Ambient temperature during rearing can alter the thermal preference of fish in a**  
470 **species-specific manner.** Boxplots comparing thermal preference ( $T_{Pref}$ ) of (A) 8-month-old lake  
471 whitefish, (B) 12-month-old lake whitefish, and (C) 12-month-old round whitefish, after  
472 exposure to different ambient temperatures during embryogenesis. Lower and upper box  
473 boundaries are 25<sup>th</sup> and 75<sup>th</sup> percentiles of the data, with the line inside the box representing the  
474 median, and error lines encompassing the entirety of the spread of data. Different letters above  
475 the boxplots denote significant differences between treatment groups.

476

477

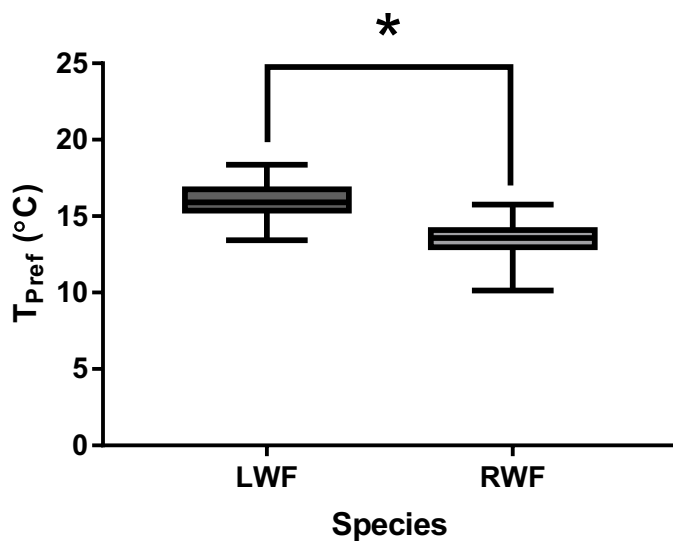

478

479 **Figure 3. Species exhibit unique thermal preferences following rearing at a common**  
480 **temperature.** Boxplots comparing thermal preference ( $T_{Pref}$ ) of 12-month-old lake whitefish  
481 (LWF) and 12-month-old round whitefish (RWF), after experiencing 2°C during embryogenesis.  
482 Lower and upper box boundaries are 25<sup>th</sup> and 75<sup>th</sup> percentiles of the data, with the line inside the  
483 box representing the median, and error lines encompassing the entirety of the spread of data. The  
484 symbol \* is used to denote a significant difference between groups.

485

486

487

488

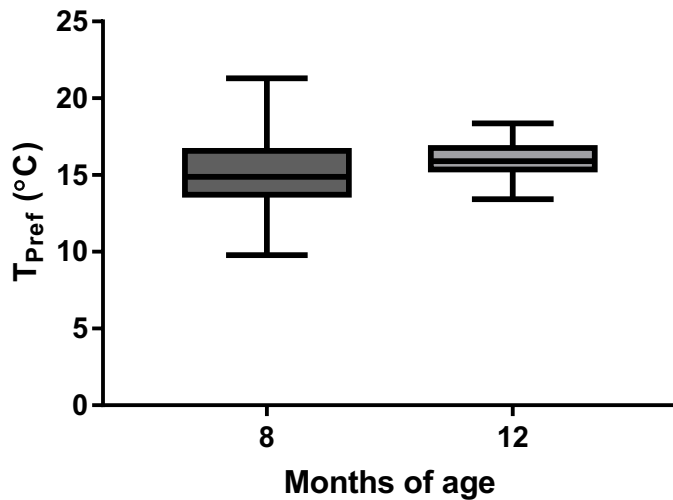

489

490 **Figure 4. Thermal preference does not change during the juvenile stage of lake whitefish.**  
491 Boxplots comparing thermal preference ( $T_{Pref}$ ) of 8-month-old and 12-month-old lake whitefish  
492 (LWF), after experiencing 2°C during embryogenesis. Lower and upper box boundaries are 25<sup>th</sup>  
493 and 75<sup>th</sup> percentiles of the data, with the line inside the box representing the median, and error  
494 lines encompassing the entirety of the spread of data.

495

#### 496 References

497

498 **Angiulli, E., Pagliara, V., Cioni, C., Frabetti, F., Pizzetti, F., Alleva, E. and Toni, M. (2020).**

499 Increase in environmental temperature affects exploratory behaviour, anxiety and social  
500 preference in *Danio rerio*. *Sci. Rep.* **10**, 1–12.

501 **Austin, J. A. and Colman, S. M. (2007).** Lake Superior summer water temperatures are  
502 increasing more rapidly than regional temperatures: A positive ice-albedo feedback.  
503 *Geophys. Res. Lett.* **34**, 1–5.

504 **Bailey, M. M. (1964).** Age, growth, and maturity of round whitefish of the Apostle islands and  
505 Isle Royale regions, Lake Superior. *Fish. Bull.* **63**, 63–75.

506 **Barrionuevo, W. R. and Burggren, W. W. (1999).** O<sub>2</sub> consumption and heart rate in  
507 developing zebrafish (*Danio rerio*): Influence of temperature and ambient O<sub>2</sub>. *Am. J.*  
508 *Physiol. - Regul. Integr. Comp. Physiol.* **276**, 505–513.

509 **Bartolini, T., Butail, S. and Porfiri, M. (2015).** Temperature influences sociality and activity of  
510 freshwater fish. *Environ. Biol. Fishes* **98**, 825–832.

511 **Berger, S. A., Diehl, S., Kunz, T. J., Albrecht, D., Oucible, A. M. and Ritzer, S. (2006).** Light  
512 supply, plankton biomass, and seston stoichiometry in a gradient of lake mixing depths.  
513 *Limnol. Oceanogr.* **51**, 1898–1905.

514 **Biro, P. A., Beckmann, C. and Stamps, J. A. (2010).** Small within-day increases in  
515 temperature affects boldness and alters personality in coral reef fish. *Proc. R. Soc. B Biol.*  
516 *Sci.* **277**, 71–77.

517 **Blaser, R. E. and Rosemberg, D. B. (2012).** Measures of anxiety in zebrafish (*Danio rerio*):

- 518 Dissociation of black/white preference and novel tank test. *PLoS One* **7**, 1–8.
- 519 **Bouton, D. and Stegemann, E.** (1993). Endangered and threatened fishes of New York.  
520 *Conservationist* **48**, 14–21.
- 521 **Bozek, M. A., Paulson, L. J. and Wilde, G. R.** (1990). Effects of ambient Lake Mohave  
522 temperatures on development, oxygen consumption, and hatching success of the razorback  
523 sucker. *Environ. Biol. Fishes* **27**, 255–263.
- 524 **Brooke, L. T.** (1975). Effect of Different Constant Incubation Temperatures on Egg Survival  
525 and Embryonic Development in Lake Whitefish (*Coregonus clupeaformis*). *Trans. Am.*  
526 *Fish. Soc.* **104**, 555–559.
- 527 **Conley, A. K., Schlesinger, M. D., Daley, J. G., Holst, L. K. and Howard, T. G.** (2021).  
528 Modeling habitat suitability and management options for maintaining round whitefish  
529 (*Prosopium cylindraceum*) in adirondack ponds. *Can. J. Fish. Aquat. Sci.* **78**, 1371–1382.
- 530 **Cucin, D. and Regier, H. A.** (1965). Dynamics and Exploitation of Lake Whitefish in Southern  
531 Georgian Bay. *J. Fish. Res. Board Canada* **23**, 221–274.
- 532 **Dado-Senn, B., Gingerich, K. N., Horvath, K. C., Field, S. L., Marrero, M. G., Maunsell, F.,**  
533 **Miller-Cushon, E. K. and Laporta, J.** (2022). Early-life heat stress exposure impacts dairy  
534 calf feeding and thermoregulatory behavior. *JDS Commun.* **3**, 38–43.
- 535 **Ebener, M. P., Kinnunen, R. E., Schneeberger, P. J., Mohr, L. C., Hoyle, J. A. and Peeters,**  
536 **P.** (2008). Management of Commercial Fisheries for Lake Whitefish in the Laurentian  
537 Great Lakes of North America. *Int. Gov. Fish. Ecosyst. Learn. from Past, Find. Solut.*  
538 *Futur.* 99–143.
- 539 **Ebener, M. P., Brenden, T. O., Wright, G. M., Jones, M. L. and Faisal, M.** (2010). Spatial  
540 and temporal distributions of lake whitefish spawning stocks in Northern lakes Michigan  
541 and Huron, 2003–2008. *J. Great Lakes Res.* **36**, 38–51.
- 542 **Eberts, R. L., Wissel, B., Manzon, R. G., Wilson, J. Y., Boreham, D. R. and Somers, C. M.**  
543 (2016). Consistent differential resource use by sympatric lake (*Coregonus clupeaformis*)  
544 and round (*Prosopium cylindraceum*) whitefish in Lake Huron: A multi-time scale isotopic  
545 niche analysis. *Can. J. Fish. Aquat. Sci.* **73**, 1072–1080.
- 546 **Edsall, T. A.** (1999). Preferred temperatures of juvenile lake whitefish. *J. Great Lakes Res.* **25**,  
547 583–588.
- 548 **Edsall, T. A. and Rottiers, D. V.** (1976). Temperature Tolerance of Young-of-the-Year Lake  
549 Whitefish, *Coregonus clupeaformis*. *J. Fish. Res. Board Canada* **33**, 177–180.
- 550 **Eme, J., Mueller, C. A., Manzon, R. G., Somers, C. M., Boreham, D. R. and Wilson, J. Y.**  
551 (2015). Critical windows in embryonic development: Shifting incubation temperatures alter  
552 heart rate and oxygen consumption of Lake Whitefish (*Coregonus clupeaformis*) embryos  
553 and hatchlings. *Comp. Biochem. Physiol. -Part A Mol. Integr. Physiol.* **179**, 71–80.
- 554 **Eme, J., Mueller, C. A., Lee, A. H., Melendez, C., Manzon, R. G., Somers, C. M., Boreham,**  
555 **D. R. and Wilson, J. Y.** (2018). Daily, repeating fluctuations in embryonic incubation  
556 temperature alter metabolism and growth of Lake whitefish (*Coregonus clupeaformis*).  
557 *Comp. Biochem. Physiol. -Part A Mol. Integr. Physiol.* **226**, 49–56.
- 558 **Faber, D.** (1970). Ecological observations on newly hatched lake whitefish in South Bay, Lake  
559 Huron. *Univ. Manitoba Press.*
- 560 **Freeberg, M. H., Taylor, W. W. and Brown, R. W.** (1990). Effect of Egg and Larval Survival  
561 on Year-Class Strength of Lake Whitefish in Grand Traverse Bay, Lake Michigan. *Trans.*  
562 *Am. Fish. Soc.* **119**, 92–100.
- 563 **Fry, F. E. and Hochachka, P. W.** (1970). *Comparative Physiology of Thermoregulation.* (ed.



- 564 Whittow, G. ).
- 565 **Gillooly, J. F. and Dodson, S. I.** (2000). The relationship of neonate mass and incubation  
566 temperature to embryonic development time in a range of animal taxa. *J. Zool.* **251**, 369–  
567 375.
- 568 **Haesemeyer, M.** (2020). Thermoregulation in fish. *Mol. Cell. Endocrinol.* **518**, 110986.
- 569 **Hampton, S. E., Fradkin, S. C., Leavitt, P. R. and Rosenberger, E. E.** (2011).  
570 Disproportionate importance of nearshore habitat for the food web of a deep oligotrophic  
571 lake. *Mar. Freshw. Res.* **62**, 350–358.
- 572 **Harman, A. A., Fuzzen, M., Stoa, L., Boreham, D., Manzon, R., Somers, C. M. and Wilson,**  
573 **J. Y.** (2021). Evaluating tank acclimation and trial length for dynamic shuttle box  
574 temperature preference assays in aquatic animals. *J. Exp. Biol.* **224**, 1–6.
- 575 **Hogman, W. .** (1971). The larvae of lake whitefish (*Coregonus clupeaformis* (Mitchell)) of  
576 Green Bay, Lake Michigan.
- 577 **Huuskonen, H., Penttinen, O. P. and Piironen, J.** (2003). Effects of temperature and parental  
578 background on the embryonic survival and metabolic rate of newly hatched Arctic charr.  
579 *Big Fish Bang. Proc. 26th Annu. Larval Fish Conf. 22-26 July 2002.*
- 580 **IPCC** (2014). *Climate change 2013: the physical science basis: Working Group I contribution to*  
581 *the Fifth assessment report of the Intergovernmental Panel on Climate Change.* (ed.  
582 Stocker, T.) Cambridge University Press.
- 583 **Jobling, M.** (1981). Temperature tolerance and the final preferendum—rapid methods for the  
584 assessment of optimum growth temperatures. *J. Fish Biol.* **19**, 439–455.
- 585 **Johnson, J. S., Aardsma, M. A., Duttlinger, A. W. and Kpodo, K. R.** (2018). Early life  
586 thermal stress: Impact on future thermotolerance, stress response, behavior, and intestinal  
587 morphology in piglets exposed to a heat stress challenge during simulated transport. *J.*  
588 *Anim. Sci.* **96**, 1640–1653.
- 589 **Jonsson, B. and Jonsson, N.** (2019). Phenotypic plasticity and epigenetics of fish: Embryo  
590 temperature affects later-developing life-history traits. *Aquat. Biol.* **28**, 21–32.
- 591 **Kellogg, R. L. and Gift, J. J.** (1983). Relationship between Optimum Temperatures for Growth  
592 and Preferred Temperatures for the Young of Four Fish Species. *Trans. Am. Fish. Soc.* **112**,  
593 424–430.
- 594 **Killen, S. S.** (2014). Growth trajectory influences temperature preference in fish through an  
595 effect on metabolic rate. *J. Anim. Ecol.* **83**, 1513–1522.
- 596 **Larsson, S.** (2005). Thermal preference of Arctic charr, *Salvelinus alpinus*, and brown trout,  
597 *Salmo trutta* - Implications for their niche segregation. *Environ. Biol. Fishes* **73**, 89–96.
- 598 **Lee, A. H., Eme, J., Mueller, C. A., Manzon, R. G., Somers, C. M., Boreham, D. R. and**  
599 **Wilson, J. Y.** (2016). The effects of increased constant incubation temperature and  
600 cumulative acute heat shock exposures on morphology and survival of Lake Whitefish  
601 (*Coregonus clupeaformis*) embryos. *J. Therm. Biol.* **57**, 11–20.
- 602 **Li, H., Zhang, X., Wu, Y., Zhang, F. and Li, C.** (2021). Environmental temperature during  
603 early life affects the personality of mosquitofish in adulthood. *Curr. Zool.* **67**, 481–488.
- 604 **Lim, M. Y. T., Manzon, R. G., Somers, C. M., Boreham, D. R. and Wilson, J. Y.** (2017). The  
605 effects of fluctuating temperature regimes on the embryonic development of lake whitefish  
606 (*Coregonus clupeaformis*). *Comp. Biochem. Physiol. -Part A Mol. Integr. Physiol.* **214**, 19–  
607 29.
- 608 **Lim, M. Y. T., Manzon, R. G., Somers, C. M., Boreham, D. R. and Wilson, J. Y.** (2018).  
609 Impacts of temperature, morpholine, and chronic radiation on the embryonic development

- 610 of round whitefish (*Prosopium cylindraceum*). *Environ. Toxicol. Chem.* **37**, 2593–2608.
- 611 **Macnaughton, C. J., Kovachik, C., Charles, C. and Enders, E. C.** (2018). Using the  
612 shuttlebox experimental design to determine temperature preference for juvenile Westslope  
613 Cutthroat Trout (*Oncorhynchus clarkii lewisi*). *Conserv. Physiol.* **6**, 1–10.
- 614 **Magnuson, J. J., Crowder, L. B. and Medvick, P. A.** (1979). Temperature as an ecological  
615 resource. *Integr. Comp. Biol.* **19**, 331–343.
- 616 **Marty, G. D., Hinton, D. E. and Cech, J. J.** (1990). Effect of incubation temperature on  
617 oxygen consumption and ammonia production by Japanese medaka, *Oryzias latipes*, eggs  
618 and newly hatched larvae. *Environ. Toxicol. Chem.* **9**, 1397–1403.
- 619 **Mitz, C., Thome, C., Cybulski, M. E., Laframboise, L., Somers, C. M., Manzon, R. G.,**  
620 **Wilson, J. Y. and Boreham, D. R.** (2014). A Self-Contained, Controlled Hatchery System  
621 for Rearing Lake Whitefish Embryos for Experimental Aquaculture. *N. Am. J. Aquac.* **76**,  
622 179–184.
- 623 **Mitz, C., Thome, C., Cybulski, M. E., Somers, C. M., Manzon, R. G., Wilson, J. Y. and**  
624 **Boreham, D. R.** (2019). Thermal dependence of size-at-hatch in the lake whitefish  
625 (*Coregonus clupeaformis*). *Can. J. Fish. Aquat. Sci.* **76**, 2069–2079.
- 626 **Mortensen, A., Ugedal, O. and Lund, F.** (2007). Seasonal variation in the temperature  
627 preference of Arctic charr (*Salvelinus alpinus*). *J. Therm. Biol.* **32**, 314–320.
- 628 **Motulsky, H. J. and Brown, R. E.** (2006). Detecting outliers when fitting data with nonlinear  
629 regression - A new method based on robust nonlinear regression and the false discovery  
630 rate. *BMC Bioinformatics* **7**, 1–20.
- 631 **Mraz, D.** (1964). Age and growth of the round Whitefish in Lake Michigan. *Trans. Am. Fish.*  
632 *Soc.* **93**, 46–52.
- 633 **Mueller, C. A., Eme, J., Manzon, R. G., Somers, C. M., Boreham, D. R. and Wilson, J. Y.**  
634 (2015). Embryonic critical windows: changes in incubation temperature alter survival,  
635 hatchling phenotype, and cost of development in lake whitefish (*Coregonus clupeaformis*).  
636 *J. Comp. Physiol. B Biochem. Syst. Environ. Physiol.* **185**, 315–331.
- 637 **Mueller, C. A., Doyle, L., Eme, J., Manzon, R. G., Somers, C. M., Boreham, D. R. and**  
638 **Wilson, J. Y.** (2017). Lipid content and fatty acid profile during lake whitefish embryonic  
639 development at different incubation temperatures. *Comp. Biochem. Physiol. -Part A Mol.*  
640 *Integr. Physiol.* **203**, 201–209.
- 641 **Neill, W. H.** (1972). Behavioral Thermoregulation by Fishes: A new experimental approach.  
642 *Science (80- )*. **176**, 1444–1445.
- 643 **Neill, W. H. and Magnuson, J. J.** (1974). Distributional Ecology and Behavioral  
644 Thermoregulation of Fishes in Relation to Heated Effluent from a Power Plant at Lake  
645 Monona, Wisconsin. *Trans. Am. Fish. Soc.* **103**, 663–710.
- 646 **Nowicki, J. P., Miller, G. M. and Munday, P. L.** (2012). Interactive effects of elevated  
647 temperature and CO<sub>2</sub> on foraging behavior of juvenile coral reef fish. *J. Exp. Mar. Bio.*  
648 *Ecol.* **412**, 46–51.
- 649 **Nytrø, A. V., Vikingstad, E., Foss, A., Hangstad, T. A., Reynolds, P., Eliassen, G., Elvegård,**  
650 **T. A., Falk-Petersen, I. B. and Imsland, A. K.** (2014). The effect of temperature and fish  
651 size on growth of juvenile lumpfish (*Cyclopterus lumpus* L.). *Aquaculture* **434**, 296–302.
- 652 **Opuszynski, K.** (1974). Selected temperatures of whitefish, *Coregonus clupeaformis* (Mitchill),  
653 in the vertical gradient tank. *Rocz. Nauk Roln., Ser. H-Rybactwo* **96**, 63–70.
- 654 **Pacifici, M., Foden, W. B., Visconti, P., Watson, J. E. M., Butchart, S. H. M., Kovacs, K.**  
655 **M., Scheffers, B. R., Hole, D. G., Martin, T. G., Akçakaya, H. R., et al.** (2015).

656 Assessing species vulnerability to climate change. *Nat. Clim. Chang.* **5**, 215–225.  
657 **Patrick, P. H., Chen, E., Parks, J., Powell, J., Poulton, J. S. and Fietsch, C. L.** (2013).  
658 Effects of Fixed and Fluctuating Temperature on Hatch of Round Whitefish and Lake  
659 Whitefish Eggs. *North Am. J. Fish. Manag.* **33**, 1091–1099.  
660 **Price, J. W.** (1940). Time-Temperature Relations in the Incubation of the Whitefish, *Coregonus*  
661 *Clupeaformis* (Mitchill). *J. Gen. Physiol.* **23**, 449–468.  
662 **Rawson, D. S.** (1951). Studies of the Fish of Great Slave Lake. *J. Fish. Res. Board Canada* **8b**,  
663 207–240.  
664 **Reynolds, W. W. and Casterlin, M. E.** (1980). The role of temperature in the environmental  
665 physiology of fishes. *Environ. Physiol. Fishes* 497–518.  
666 **Ryan, K. M. and Crawford, S. S.** (2014). Distribution and abundance of larval lake whitefish  
667 (*Coregonus clupeaformis*) in Stokes Bay, Lake Huron. *J. Great Lakes Res.* **40**, 755–762.  
668 **Schnurr, M. E., Yin, Y. and Scott, G. R.** (2014). Temperature during embryonic development  
669 has persistent effects on metabolic enzymes in the muscle of zebrafish. *J. Exp. Biol.* **217**,  
670 1370–1380.  
671 **Schwab, D. J., Leshkevich, G. A. and Muhr, G. C.** (1999). Automated mapping of surface  
672 water temperature in the Great Lakes. *J. Great Lakes Res.* **25**, 468–481.  
673 **Scott, W. . and Crossman, E. J.** (1973). *Freshwater fishes of Canada*.  
674 **Scott, G. R. and Johnston, I. A.** (2012). Temperature during embryonic development has  
675 persistent effects on thermal acclimation capacity in zebrafish. *Proc. Natl. Acad. Sci. U. S.*  
676 *A.* **109**, 14247–14252.  
677 **Stevens, E. D. and Fry, F. E.** (1970). The rate of thermal exchange in a teleost, *Tilapia*  
678 *mossambica*. *Can. J. Zool.* **48**, 221–226.  
679 **Sun, L. and Chen, H.** (2014). Effects of water temperature and fish size on growth and  
680 bioenergetics of cobia (*Rachycentron canadum*). *Aquaculture* **426–427**, 172–180.  
681 **Thome, C., Mitz, C., Somers, C. M., Manzon, R. G., Boreham, D. R. and Wilson, J. Y.**  
682 (2016). Incubation of lake whitefish (*Coregonus clupeaformis*) embryos in cooling water  
683 discharge and the impacts of fluctuating thermal regimes on development. *Can. J. Fish.*  
684 *Aquat. Sci.* **73**, 1213–1221.  
685  
686  
687  
688  
689  
690  
691  
692  
693  
694  
695  
696  
697
